# Supplementary material
Source: publisher figshare collection journal article supplement (https://acs.figshare.com/ndownloader/files/8342759)
Supplement: Supplementary file 1 [file 8342759]

## Supporting Information

# **Lignin Functionalization Through Chemical Demethylation: Preparation and Tannin-like Properties of Demethylated Guaiacyl-type Synthetic Lignins**

Kaori Sawamura,<sup>1</sup> Yuki Tobimatsu,<sup>1,2</sup> Hiroshi Kamitakahara,<sup>1</sup> Toshiyuki Takano<sup>1,\*</sup>

<sup>1</sup>Graduate School of Agriculture, Kyoto University, Sakyo-ku, Kyoto 606-8502, Japan;

<sup>2</sup>Research Institute for Sustainable Humanosphere, Kyoto University, Gokasho, Uji,  
Kyoto 611-0011, Japan;

\*Correspondence: Toshiyuki Takano (takatmys@kais.kyoto-u.ac.jp; +81-75-753-6254)

## **List of Supporting Materials**

- Figure S1.** HSQC NMR spectra of GDHP and deMeGDHP-DSHs.
- Figure S2.** HSQC NMR spectra of GDHP and deMeGDHP-HIs.
- Figure S3.** HSQC NMR spectra of GDHP and deMeGDHP-ICHs.
- Figure S4.** FT-IR spectra of epoxy-GDHPs and epoxy-deMeGDHP-ICHs.

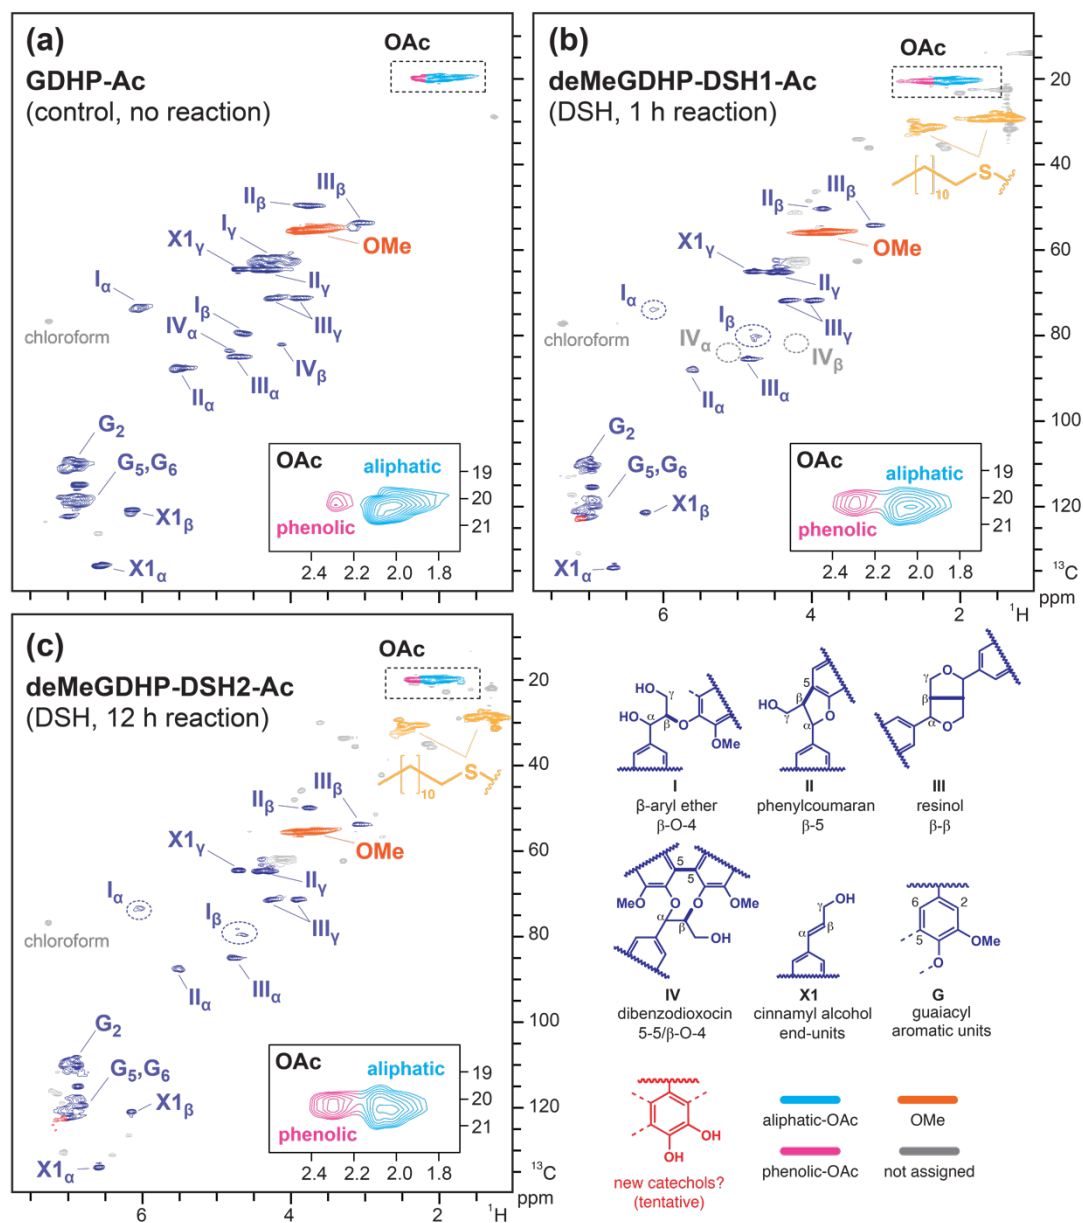

**Figure S1.** Short range  $^1\text{H}$ – $^{13}\text{C}$  correlation (HSQC) NMR spectra of acetylated samples of guaiacyl synthetic lignin (GDHP-Ac, **a**) and demethylated GDHPs prepared with 1-dodecanthiol, DSH with 1h (deMeGDHP-DSH1-Ac, **b**) and 12h (deMeGDHP-DSH2-Ac, **c**) reaction times.

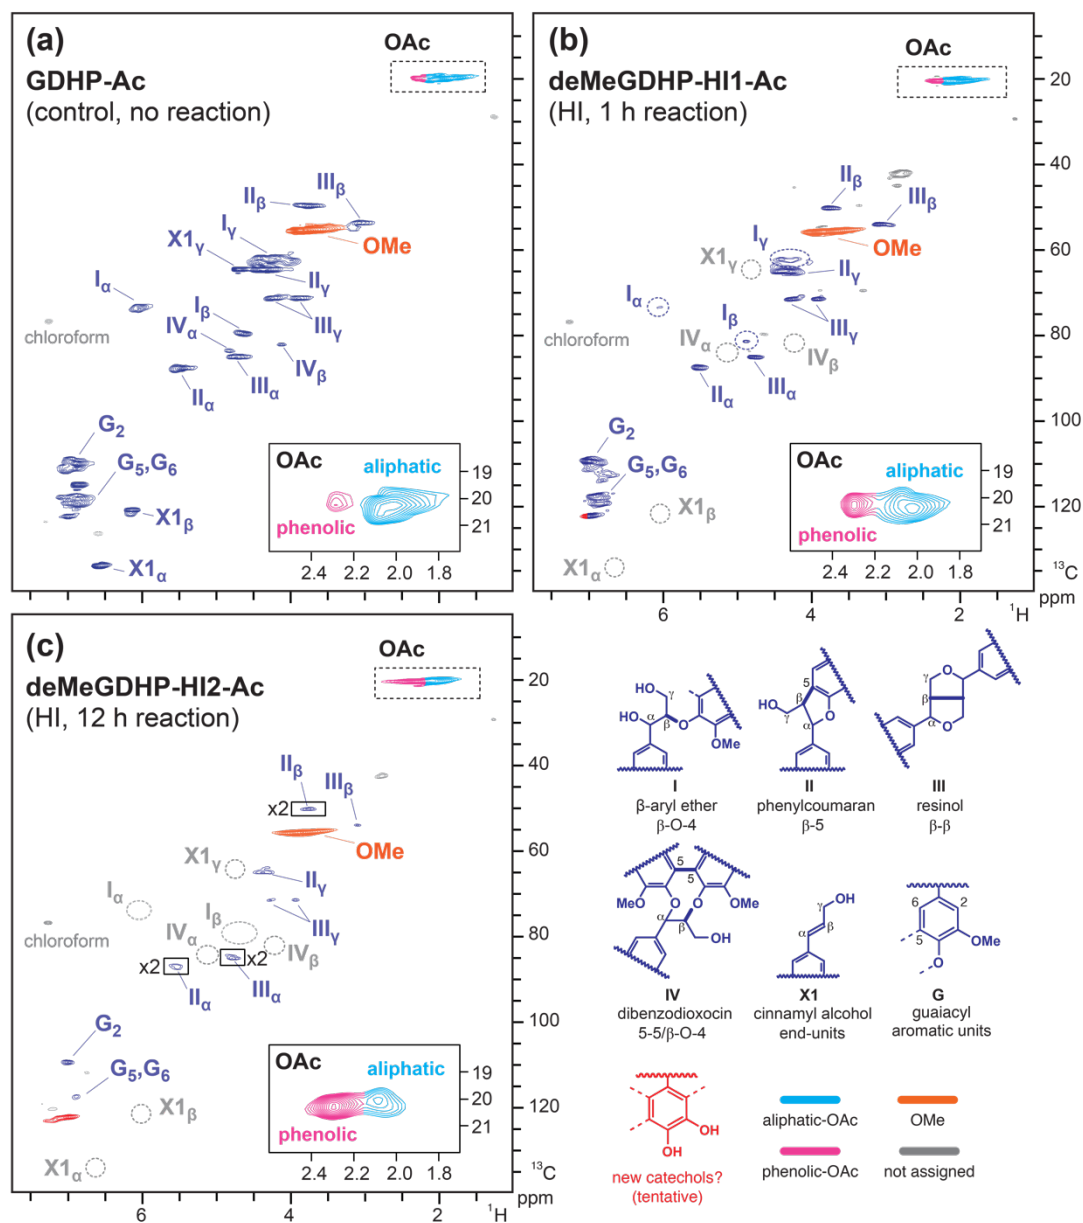

**Figure S2.** Short range  $^1\text{H}$ - $^{13}\text{C}$  correlation (HSQC) NMR spectra of acetylated samples of guaiacyl synthetic lignin (GDHP-Ac, **a**) and demethylated GDHPs prepared with hydroiodic acid, HI with 1h (deMeGDHP-HI1-Ac, **b**) and 12h (deMeGDHP-HI2-Ac, **c**) reaction times.

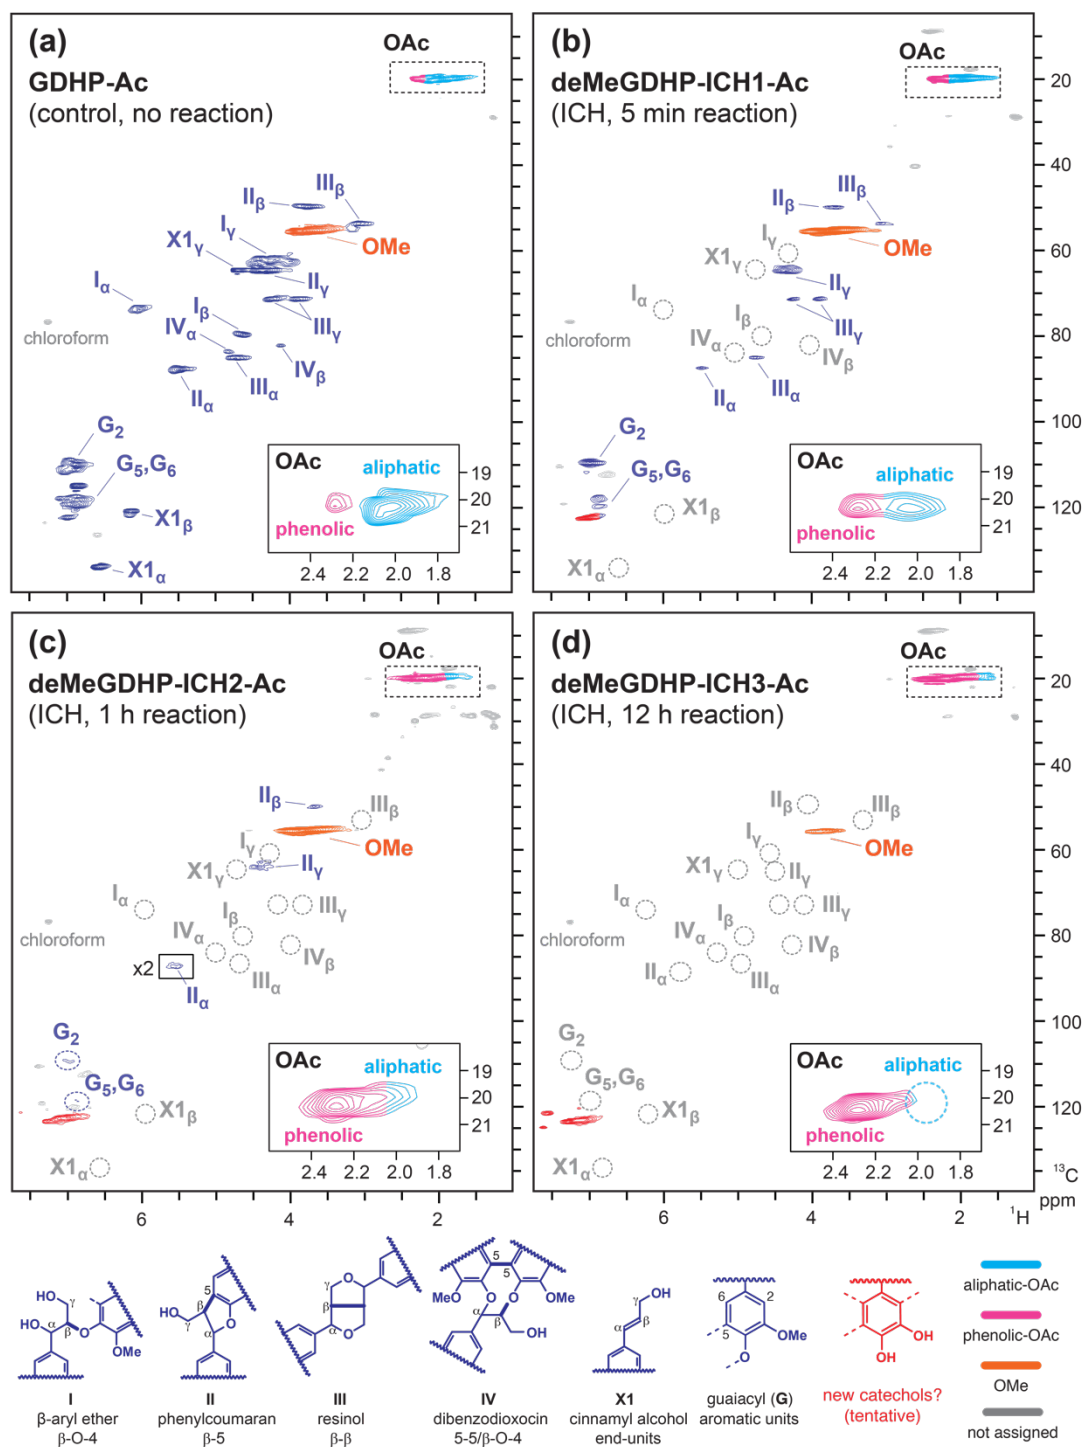

**Figure S3.** Short range  $^1\text{H}$ - $^{13}\text{C}$  correlation (HSQC) NMR spectra of acetylated samples of guaiacyl synthetic lignin (GDHP-Ac, **a**) and demethylated GDHPs prepared with iodocyclohexane, ICH with 5 min (deMeGDHP-ICH1-Ac, **b**), 1h (deMeGDHP-ICH2-Ac, **c**), and 12h (deMeGDHP-ICH3-Ac, **d**) reaction times.

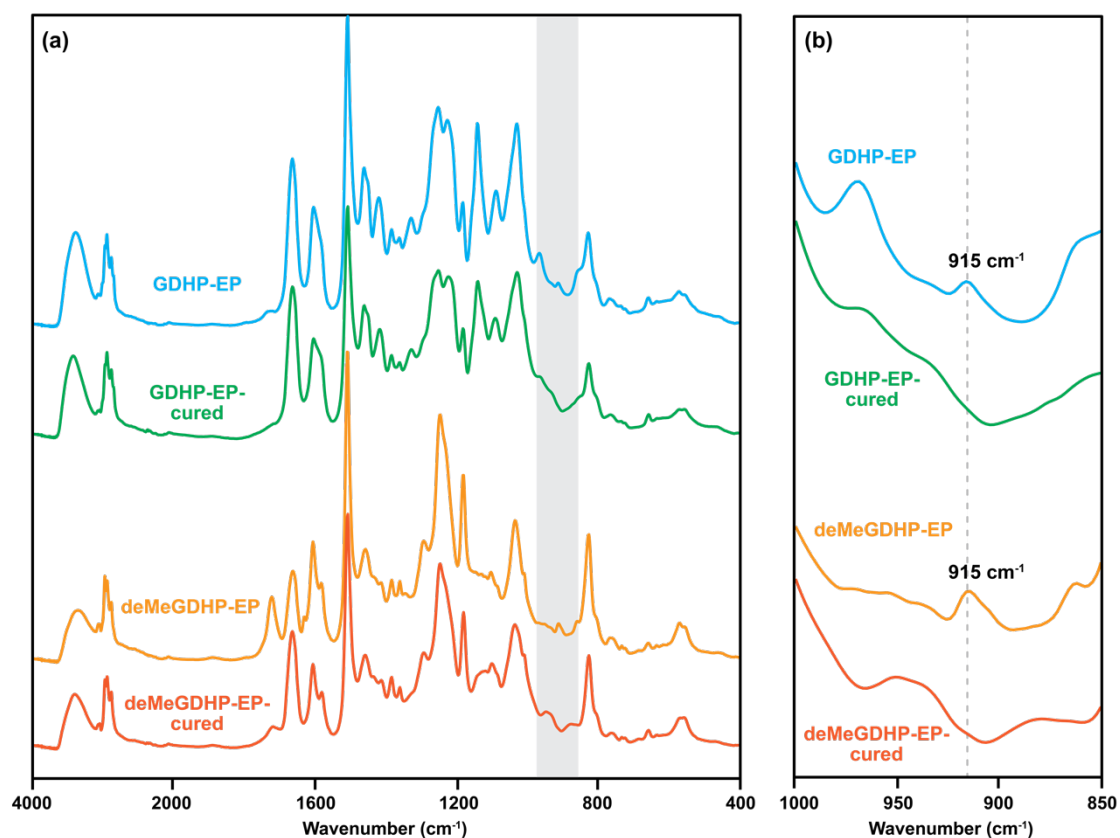

**Figure S4.** FT-IR spectra of non-cured and cured epoxy resins from guaiacyl synthetic lignin (GDHP-EP and GDHP-EP-cured) and demethylated GDHPs prepared with iodocyclohexane with 12h reaction time (deMeGDHP-ICH3-EP and deMeGDHP-ICH3-EP-cured). **(a)** Full scanned regions. **(b)** Expanded regions showing epoxy vibrations at 915  $\text{cm}^{-1}$ .
